# Supplementary material for: Dual promoters of the major catalase (KatA) govern distinct survival strategies of Pseudomonas aeruginosa
Source: PubMed Central journal article supplement (PMC4974557; doi:10.1038/srep31185), 2016-08-05
Supplement: srep31185-s1.pdf [file srep31185-s1.pdf]

## Supplementary Information

# Dual promoters of the major catalase (KatA) govern distinct survival strategies of *Pseudomonas aeruginosa*

In-Young Chung, Bi-o Kim, Hye-Jung Jang, and You-Hee Cho\*

*Department of Pharmacy, College of Pharmacy and Institute of Pharmaceutical Sciences, CHA University, Gyeonggi-do 463-400, Korea*

\* Corresponding author.

Phone: 82-31-881-7165.

E-mail: youhee@cha.ac.kr

Running Title: Dual promoters for dual roles of KatA

Keywords: *Pseudomonas aeruginosa*, *katA*, H<sub>2</sub>O<sub>2</sub>, nitrogen oxides

## Supplementary Information

**Table S1. Primers used in this study.**

| <i>Primer<sup>a</sup></i>           | <i>Sequence (engineered enzyme site)</i>                   | <i>Purpose</i>                    |
|-------------------------------------|------------------------------------------------------------|-----------------------------------|
| <u>Gene mutation and S1 mapping</u> |                                                            |                                   |
| anr-N1                              | 5'-GCGTCGCGAATTCGAGCCC-3' ( <i>EcoRI</i> )                 | <i>anr</i> deletion               |
| anr-C1                              | 5'-GCCCAGCCCAGAAAGCTTCCA -3' ( <i>HindIII</i> )            | <i>anr</i> deletion               |
| anr-UC                              | 5'-ACTGCTGGGCGGAGAACAGCGAATCCATGTCT-3'                     | <i>anr</i> deletion               |
| anr-DN                              | 5'-AGACATGGATTCGCTGTTCTCCGCCAGCAGT-3'                      | <i>anr</i> deletion               |
| katA-N10                            | 5'-CCGAATAAGGCATCTGCTGC-3'                                 | <i>katAp</i> mutation/ S1 mapping |
| katA-S1C1                           | 5'-ACCACACGTCCTGCAGCAAC -3' ( <i>PstI</i> )                | <i>katAp</i> mutation/ S1 mapping |
| katAp1m-UC                          | 5'-CAGGTTAGGTACCAATGACAGCCCTCCAACAATC-3' ( <i>KpnI</i> )'  | <i>katAp1m</i> mutation           |
| katAp1m-DN                          | 5'- TGTCATTGGTACCTAACCTGCTTTTACGAAAAGC-3' ( <i>KpnI</i> )' | <i>katAp1m</i> mutation           |
| katAp2m-UC                          | 5'-AATCATCGGATCCGACCAGGGATTGGCGGAGGA-3' ( <i>BamHI</i> )   | <i>katAp2m</i> mutation           |
| katAp2m-DN                          | 5'-CCTGGTCGGATCCGATGATTTCCGTGTAGCC-3' ( <i>BamHI</i> )     | <i>katAp2m</i> mutation           |
| <u>LacZ transcriptional fusion</u>  |                                                            |                                   |
| katA-N3                             | 5'-CGTAGATCTGGTTGATCGTC-3' ( <i>BglII</i> )                | LacZ fusion                       |
| pQF50-lacZ-C1                       | 5'-CAGCAGGATATCCTGCACC-3' ( <i>EcoRV</i> )                 | LacZ fusion                       |
| katA-lacZ-UC <sup>b</sup>           | 5'-TTAATACCCTCTAGCTAGAACGTGCTATGAAGCGAA-3'                 | LacZ fusion                       |
| katA-lacZ-DN <sup>b</sup>           | 5'- <b>TTCGCTTCATAGCACGTT</b> CTAGCTAGAGGGTATTAA-3'        | LacZ fusion                       |

a: N and C refer to the forward and reverse primers for each gene, respectively.

b: The *katA* promoter region is indicated (bold).

## Supplementary Information

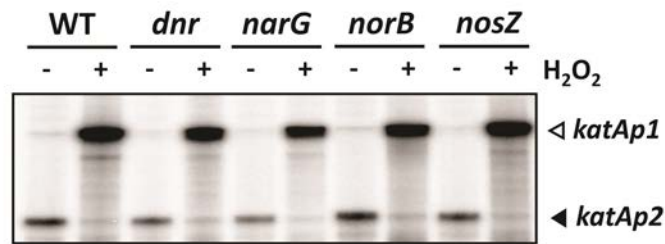

**Fig. S1. Transcription profiles of *katA* promoters in various mutants.**

The transcription patterns were assessed by low-resolution S1 nuclease assay with H<sub>2</sub>O<sub>2</sub> treatments in some mutants for dissimilatory nitrate respiration grown in LB. Total RNA (50 µg) that had been prepared from the wild type (WT) and the mutant (*dnr*, *narG*, *norB*, and *nosZ*) cells with (+) or without (-) 1 mM H<sub>2</sub>O<sub>2</sub> treatment for 10 min at OD<sub>600</sub> of 0.5 were subjected to S1 nuclease assay. The two transcriptional start sites of the *katA* gene are indicated by open (*katAp1*) and closed (*katAp2*) arrows.

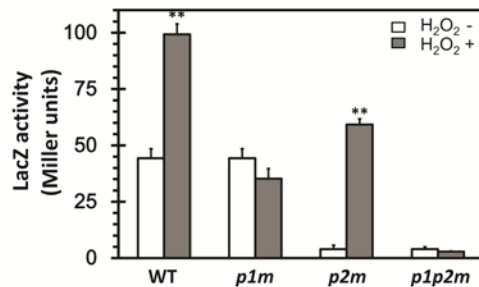

**Fig. S2. H<sub>2</sub>O<sub>2</sub>-induced transcription of the *katA* promoter fusions.**

H<sub>2</sub>O<sub>2</sub>-induced *katA* promoter activities were determined in the wild type cells containing one of the promoter fusions (WT, *p1m*, *p2m* and *p1p2m*). The cells were grown in LB with 15 mM KNO<sub>3</sub> to the mid-logarithmic growth phase, and then treated with (filled bar) or without (empty bar) 1 mM H<sub>2</sub>O<sub>2</sub> for 10 min. The aliquots from the cells were subjected to β-galactosidase (LacZ) assay. The error bars represent the standard deviations from five independent experiments (two cultures per experiment). Statistical significance based on the Student's *t*-test is indicated (\*\*, *p* < 0.005).

## Supplementary Information

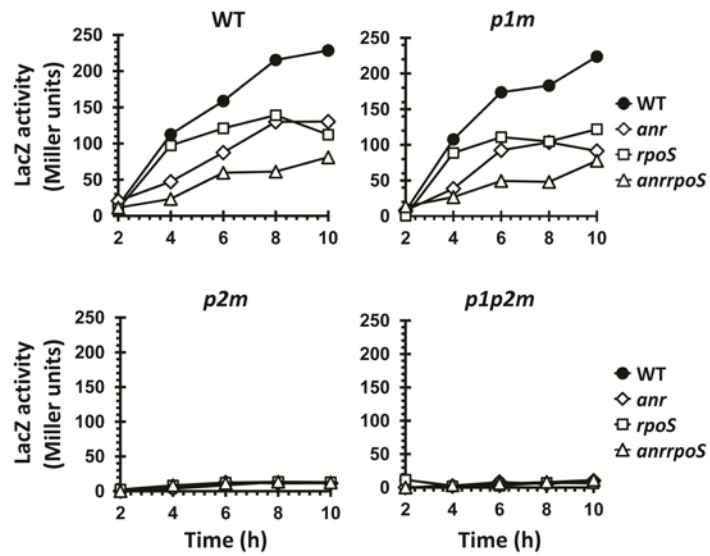

**Fig. S3. Stationary phase-induced transcription of the *katA* promoter fusions.**

The growth phase-dependent transcriptions of the *katA* promoter fusions were assessed using PA14 (●, WT) as well as in its isogenic *anr* and *rpoS* null mutants (◇, *anr*; □, *rpoS*; △, *anr rpoS*), which harbor one of the *katA* promoter fusions (A, WT; B, *p1m*; C, *p2m*; D, *p1p2m*). The culture aliquots were harvested at every 2 h from 2 to 10 h post-inoculation, and then subjected to LacZ assay. The data represent the average of the means of three independent experiments (two cultures per experiment).
